# Supplementary material
Source: PubMed Central journal article supplement (PMC3501090)
Supplement: Supp_Table.pdf [file Supp_Table.pdf]

## Supplementary Data

SUPPLEMENTARY TABLE S1. CHARACTERISTICS OF THE SASANG CONSTITUTIONAL TYPES<sup>a</sup>

| <i>Characteristics</i>  | <i>TY</i>                                          | <i>TE</i>                                  | <i>SY</i>                                | <i>SE</i>                                |
|-------------------------|----------------------------------------------------|--------------------------------------------|------------------------------------------|------------------------------------------|
| Physiology <sup>b</sup> | Lung > Liver<br>Respiratory > Preservative         | Liver > Lung<br>Respiratory < Preservative | Spleen > Kidney<br>Digestive > Excretive | Kidney > Spleen<br>Digestive < Excretive |
| Physique                | Big<br>Slender waist<br>Developed nape of the neck | Big<br>Thick waist                         | Small<br>Developed chest<br>Small hip    | Small<br>Weak chest<br>Developed hip     |
| Psychology              | Progressive<br>Creative                            | Pragmatic<br>Gentle                        | Hot-tempered<br>Unstable                 | Nervous<br>Logical                       |

<sup>a</sup>This table was constructed by adaptations from previously published tables.<sup>2,3</sup>

<sup>b</sup>The names of organs symbolize physiologic function rather than anatomical identity.  
TE, *Taeum*; SE, *Soeum*; SY, *Soyang*.
